# Supplementary material for: Feasibility, safety and preliminary efficacy of preoperative stereotactic radiotherapy on the future pancreatic neck transection margin to reduce the risk of pancreatic fistula after high-risk pancreatoduodenectomy (FIBROPANC): protocol for a multicentre, single-arm trial
Source: PubMed Central journal article supplement — BMJ Open. 2024 Sep 24;14(9):e087193. doi: 10.1136/bmjopen-2024-087193 (PMC11423754; doi:10.1136/bmjopen-2024-087193), 2024-09-24
Supplement: bmjopen-14-9-s001.pdf [file bmjopen-14-9-s001.pdf]

## **Proefpersoneninformatie voor deelname aan medisch-wetenschappelijk onderzoek**

### **Preoperatieve lokale bestraling ter voorkoming van alvleesklierlekkage na pancreatoduodenectomie (Whipple) operatie ('FIBROPANC')**

Geachte heer, mevrouw,

U bent mondeling geïnformeerd over het onderzoek naar preoperatieve lokale bestraling ter voorkoming van alvleesklierlekkage na een Whipple operatie. In deze brief vindt u nogmaals alle informatie. Lees deze informatie rustig door en bespreek het eventueel met uw partner, vrienden of familie. Wanneer u vragen heeft, kunt u deze aan de onderzoeker of uw hoofdbehandelaar stellen. U kunt ook de onafhankelijke deskundige, die aan het eind van deze brief genoemd wordt, om aanvullende informatie vragen. Meedoen aan dit onderzoek is geheel vrijwillig. Om mee te doen is uw schriftelijke toestemming nodig.

#### **1. Algemene informatie**

Dit onderzoek is opgezet in samenwerking met het Amsterdam UMC, het Erasmus Medisch Centrum en het Universitair Medisch Centrum Utrecht. De medisch ethische toetsingscommissie van het Amsterdam UMC, locatie AMC heeft dit onderzoek goedgekeurd. Algemene informatie over de toetsing van onderzoek vindt u op de website van de Rijksoverheid: [www.rijksoverheid.nl/mensenonderzoek](http://www.rijksoverheid.nl/mensenonderzoek). Aan dit onderzoek zullen 33 proefpersonen deelnemen. U bent benaderd om mee te doen aan dit onderzoek omdat u aan een aantal criteria voldoet. U bent 18 jaar of ouder en zal binnenkort een operatie ondergaan in verband met een kwaadaardige tumor of een voorstadium hiervan in het gebied waar de galbuis en de alvleesklierbuis samenkomen, de galwegen zelf of in de twaalfvingerige darm (medisch: de peri-ampullaire regio). Uw behandelend arts heeft beoordeeld dat u een hoog risico loopt op het ontwikkelen van naad lekkage na de operatie. Indien u meedoet met een ander medisch-wetenschappelijk onderzoek, vertel dit dan aan uw onderzoeker of arts.

#### **2. Doel van het onderzoek**

Het doel van dit onderzoek is uitzoeken hoe veilig en werkzaam eenmalige gerichte bestraling voor de operatie op een klein gebied van 4cm van de alvleesklier ter plaatse van de nieuwe verbinding is bij patiënten met een hoog risico op alvleesklierlekkage.

#### **3. Achtergrond van het onderzoek**

U zult binnenkort een alvleesklieroperatie ondergaan waarbij de kop van uw alvleesklier, twaalfvingerige darm en galblaas verwijderd zullen worden (medische term: pancreatoduodenectomie of Whipple operatie). Het gedeelte van de alvleesklier dat in het lichaam blijft, wordt tijdens de operatie vastgehecht aan de darm. Na de operatie kan deze nieuwe verbinding gaan lekken (medische term: pancreasfistel). Deze vorm van lekkage kan zorgen voor ontstekingen en soms zelfs inwendige bloedingen of overlijden

tot gevolg hebben en is daarom een zeer gevaarlijke complicatie. Patiënten die een Whipple operatie ondergaan vanwege een andere tumor dan alveeskliekkanker met ook een smalle diameter van de alveeskliekbuis, hebben een risico van ruim 25% op het ontwikkelen van een pancreasfistel. In deze hoog risico groep komt deze complicatie dus voor in 1 op de 4 patiënten die de operatie ondergaat.

Uit onderzoeken bij patiënten met alveeskliekkanker is gebleken dat er minder naadlekkage optreedt wanneer een alveesklier vóór de operatie wordt bestraald. Dit komt doordat bestraling het alveesklieeweefsel steviger maakt, waardoor de nieuwe verbinding tussen de alveesklier en de darm steviger is. Op dit moment krijgen alleen patiënten met alveeskliekkanker bestraling vóór de operatie, maar patiënten met een hoog risico op lekkage hebben vaak een tumor nabij de alveesklier gelegen (medisch: de peri-ampullaire regio). Daarom is het doel van dit onderzoek om uit te zoeken hoe veilig en werkzaam eenmalige gerichte bestraling voor de operatie op een klein gebied van 4cm van de alveesklier ter plaatse van de nieuwe verbinding is bij patiënten met een hoog risico op alveesklieklekkage. Het acroniem voor deze studie is 'de FIBROPANC'. Door bestraling wordt het alveesklieeweefsel steviger, dit wordt ook wel 'FIBROtisch' genoemd. Een ander woord voor de alveesklier is de 'PANCreas'. Het acroniem staat dus voor 'fibrotische pancreas'.

#### **4. Wat meedoen inhoudt**

Indien u meedoet aan dit onderzoek zult u enkele weken vóór de operatie eenmalig een gerichte lokale bestraling krijgen op 4cm alveesklieeweefsel ter plaatse van de toekomstige nieuwe verbinding tussen alveesklier en darm. Voorafgaand aan de operatie zal er aanvullend onderzoek worden gedaan door middel van een CT-scan. Op diezelfde dag wordt er een matras op maat gemaakt zodat u zo stil mogelijk ligt tijdens de bestraling. De bestraling vindt enige tijd later plaats op de radiotherapie afdeling van de deelnemende ziekenhuizen (Amsterdam UMC, locatie VUmc, Erasmus MC, UMC Utrecht of elders indien aangegeven). Op de dag van de bestraling wordt nog een CT-scan gemaakt in de bestralingspositie. Deze CT-scan en bestraling duren samen ongeveer 1 uur.. Deelname aan dit onderzoek heeft geen invloed op het type operatie die u krijgt.

#### **5. Wat vragen wij van u?**

De afspraken zijn dat u

- afspraken voor bezoeken nakomt.
- In totaal 3 keer extra naar het ziekenhuis komt (zie bijlage C)
- de deelnemerskaart van het onderzoek bij u draagt. Hierop staat dat u meedoet aan dit onderzoek. Er staat ook op wie in geval van nood moet worden gewaarschuwd. Laat deze kaart zien als u bij een [andere] arts komt.

Het is belangrijk dat u contact opneemt met de onderzoeker:

- als u in een ziekenhuis wordt opgenomen of behandeld.
- als u plotseling gezondheidsklachten krijgt.
- als u niet meer wilt meedoen aan het onderzoek.
- als uw contactgegevens wijzigen.

## 6. Mogelijke ongemak en risico's

Het is belangrijk dat u de mogelijke voor- en nadelen goed afweegt voordat u besluit mee te doen.

### Wat zijn voor u de voordelen?

Het voordeel van deze studie is het mogelijk voorkomen van alvleesklier-lekkage na de Whipple operatie. Deze vorm van lekkage kan leiden tot ernstige ontstekingen en bloedingen, wat in sommige gevallen kan leiden tot opname op de intensive care of zelfs tot de dood. Wanneer een alvleesklier-lekkage ontstaat, is er vaak noodzaak tot het uitvoeren van interventies zoals het plaatsen van drains of zelfs heroperatie(s). Het voordeel van deze studie is dat eenmalige lokale bestraling op 4cm alvleesklier dit risico mogelijk verlaagt.

### Wat zijn de mogelijke ongemakken en risico's?

Voor de CT-scans maken we gebruik van röntgenstraling. De stralingsbelasting van dit onderzoek is 9 miliSievert (mSv). Voor de bestraling van de alvleesklier wordt gebruikt gemaakt van ioniserende straling met eenmalige dosis van 12 Sievert (Sv). Ter vergelijking: de achtergrondstraling in Nederland is ~2,5 mSv per jaar. De straling die tijdens het onderzoek wordt gebruikt kan leiden tot schade aan uw gezondheid. Mogelijke nadelen te gevolge van de radiotherapie kunnen bestaan uit vermoeidheid of maag-darmklachten (misselijkheid, braken of diarree, maagzweer). Na bestraling kunnen in zeldzame gevallen tweede tumoren ontstaan. Bij deze eenmalige bestraling worden deze risico's verwaarloosbaar geacht. Wel adviseren we u de komende tijd niet nogmaals aan een wetenschappelijk onderzoek met stralingsbelasting mee te doen. Onderzoek of behandeling met straling om een medische reden is geen bezwaar. Uw behandelend arts zal de mogelijke bijwerkingen ook met u bespreken. Indien u hierover vragen heeft, kunt u altijd contact opnemen met de onderzoeker, uw arts of de onafhankelijke arts. De contactgegevens vindt u aan het einde van dit formulier.

## 7. Als u niet wilt meedoen of wilt stoppen met het onderzoek

U beslist zelf of u meedoet aan het onderzoek. Deelname is vrijwillig. U kunt uw toestemming voordeelname weigeren en uw toestemming op elk tijdstip zonder opgaaf van redenen weer intrekken. Uw beslissing om niet deel te nemen of om in de toekomst uw deelname aan de FIBROPANC studie te beëindigen, zal geen nadelige gevolgen hebben voor uw verdere behandeling en geen invloed hebben op de zorg en aandacht waarop u in uw ziekenhuis recht hebt. Wel vragen wij u om dit direct te melden aan de onderzoeker. De gegevens die tot dat moment zijn verzameld, worden gebruikt voor het onderzoek. Als er nieuwe informatie over het onderzoek beschikbaar komt die belangrijk voor u is, laat

de onderzoeker dit aan u weten. U wordt dan gevraagd of u blijft meedoen.

## **8. Einde van het onderzoek**

Uw deelname aan het onderzoek stopt als:

- De studie voltooid is;
- U zelf kiest om te stoppen;
- De onderzoeker het beter voor u vindt om te stoppen;
- Het Amsterdam UMC, de overheid of de beoordelende medische ethische toetsingscommissie besluiten om het onderzoek te stoppen.

Het hele onderzoek is afgelopen als alle deelnemers de studie periode doorlopen hebben. Zodra de studie afgelopen is, zullen de resultaten van de studie worden geanalyseerd en in een wetenschappelijk artikel worden verwerkt. Dit wetenschappelijk artikel zal ter publicatie worden aangeboden aan één van de wetenschappelijke tijdschriften. Indien u het wenst kunt u hier over persoonlijk worden ingelicht.

## **9. Gebruik en bewaren van uw gegevens en lichaamsmateriaal**

Voor dit onderzoek worden uw persoonsgegevens en lichaamsmateriaal (alvleesklierweefsel) verzameld, gebruikt en bewaard. Het gaat om gegevens zoals uw naam, geboortedatum en om gegevens over uw gezondheid. Voor dit onderzoek wordt een gedeelte van het alvleesklierweefsel bewaard dat tijdens de operatie verwijderd is. Dit weefsel wordt extra goed bekeken op stralingseffecten (fibrose) op de pathologie afdeling. Het verzamelen, gebruiken en bewaren van uw gegevens en uw alvleesklierweefsel is nodig om de vragen die in dit onderzoek worden gesteld te kunnen beantwoorden en de resultaten te kunnen publiceren. Wij vragen voor het gebruik van uw gegevens en lichaamsmateriaal uw toestemming.

### Vertrouwelijkheid van uw gegevens en lichaamsmateriaal

Om uw privacy te beschermen krijgen uw gegevens een code. Uw naam en andere gegevens die u direct kunnen identificeren worden daarbij weggelaten. Alleen met de sleutel van de code zijn gegevens tot u te herleiden. De sleutel van de code blijft veilig opgeborgen in de lokale onderzoeksinstelling. De gegevens en lichaamsmateriaal die naar de opdrachtgever worden gestuurd bevatten alleen de code, maar niet uw naam of andere gegevens waarmee u kunt worden geïdentificeerd. Ook in rapporten en publicaties over het onderzoek zijn de gegevens niet tot u te herleiden.

### Toegang tot uw gegevens voor controle

Sommige personen kunnen op de onderzoekslocatie toegang krijgen tot al uw gegevens. Ook tot de gegevens zonder code. Dit is nodig om te kunnen controleren of het onderzoek goed en betrouwbaar is uitgevoerd. Personen die ter controle inzage krijgen in uw gegevens zijn het onderzoeksteam, de ziekenhuisadministratie, een controleur/monitor die voor de onderzoeker van het onderzoek werkt OF die door de onderzoeker van het onderzoek is ingehuurd en nationale en internationale toezichthoudende autoriteiten, bijvoorbeeld, de Inspectie Gezondheidszorg en Jeugd. Zij houden uw gegevens geheim. Wij vragen u voor deze inzage toestemming te geven.

#### Bewaartermijn gegevens en lichaamsmateriaal

Uw gegevens moeten 20 jaar worden bewaard op de onderzoekslocatie. Uw lichaamsmateriaal wordt niet onmiddellijk na gebruik vernietigd. Het wordt bewaard om daarop in de loop van dit onderzoek nog nieuwe bepalingen te kunnen doen die te maken hebben met dit onderzoek.

#### Bewaren en gebruik van gegevens en lichaamsmateriaal voor ander onderzoek

Uw gegevens en lichaamsmateriaal (alvleesklierweefsel) kunnen na afloop van dit onderzoek ook nog van belang zijn voor ander wetenschappelijk onderzoek op het gebied van uw aandoening. Daarvoor zullen uw gegevens en lichaamsmateriaal 20 jaar worden bewaard. U kunt op het toestemmingsformulier aangeven of u hier wel of niet mee instemt. Indien u hier niet mee instemt, kunt u gewoon deelnemen aan het huidige onderzoek.

#### Intrekken toestemming

U kunt uw toestemming voor gebruik van uw persoonsgegevens altijd weer intrekken. Dit geldt voor dit onderzoek en ook voor het bewaren en het gebruik voor het toekomstige onderzoek. De onderzoeksgegevens die zijn verzameld tot het moment dat u uw toestemming intrekt worden nog wel gebruikt in het onderzoek. Uw lichaamsmateriaal wordt na intrekking van uw toestemming vernietigd. Als er al metingen met dat lichaamsmateriaal zijn gedaan, dan worden die gegevens nog wel gebruikt.

#### Meer informatie over uw rechten bij verwerking van gegevens

Voor algemene informatie over uw rechten bij verwerking van uw persoonsgegevens kunt u de website van de Autoriteit Persoonsgegevens raadplegen.

Bij vragen over uw rechten kunt u contact opnemen met de verantwoordelijke voor de verwerking van uw persoonsgegevens. Voor dit onderzoek is dat:

Erasmus MC. Zie bijlage A voor contactgegevens.

Bij vragen of klachten over de verwerking van uw persoonsgegevens raden we u aan eerst contact op te nemen met de onderzoekslocatie. U kunt ook contact opnemen met de Functionaris voor de Gegevensbescherming van de instelling Erasmus MC (zie bijlage A voor contactgegevens) of de Autoriteit Persoonsgegevens.

## **10. Verzekering voor proefpersonen**

Het Amsterdam UMC, locatie AMC heeft een verzekering afgesloten voor alle deelnemers aan dit onderzoek. De verzekering dekt schade door het onderzoek. Niet alle schade is gedekt. In **bijlage B** vindt u meer informatie over de verzekering. Daar staat ook aan wie u schade kunt melden.

## **11. Informeren huisarts**

Wij sturen uw huisarts altijd een brief of e-mail om te laten weten dat u meedoet aan het onderzoek. Dit is voor uw eigen veiligheid. Als u dit niet goed vindt, kunt u niet meedoen aan dit onderzoek.

## **12. Vergoeding voor meedoen**

Er zijn voor u geen extra kosten of vergoedingen verbonden aan dit onderzoek.

## **13. Vragen of klachten**

Bij vragen kunt u contact opnemen met het onderzoeksteam. Voor onafhankelijk advies over meedoen aan dit onderzoek kunt u terecht bij de onafhankelijke arts (zie **bijlage A**). Hij weet veel over het onderzoek en het onderwerp, maar staat niet in direct verband met dit onderzoek. Bij klachten kunt u het beste terecht bij de onafhankelijke klachtencommissie van uw ziekenhuis. Alle gegevens vindt u in **bijlage A**: Contactgegevens.

## **14. Ondertekening toestemmingsformulier**

Wanneer u voldoende bedenktijd heeft gehad, wordt u gevraagd te beslissen over deelname aan dit onderzoek. Indien u toestemming geeft, zullen wij u vragen deze op de bijbehorende toestemmingsverklaring schriftelijk te bevestigen. Door uw schriftelijke toestemming geeft u aan dat u de informatie heeft begrepen en instemt met deelname aan het onderzoek. Het handtekeningenblad wordt door uw behandelend arts bewaard. U krijgt een kopie of een tweede exemplaar van deze toestemmingsverklaring.

## **15. Bijlagen bij deze informatie**

- A. Contactgegevens**
- B. Informatie over de verzekering**
- C. Overzicht bezoeken**
- D. Toestemmingsformulier proefpersoon**

## **Bijlage A: Contactgegevens**

Leonor Wismans  
PhD kandidaat Heelkunde  
Erasmus Medisch Centrum  
Rotterdam, Nederland  
Tel: 010 703 34 09  
Email: l.wismans@erasmusmc.nl

Prof. dr. C.H. van Eijck  
Chirurg  
Afdeling chirurgie  
Erasmus Medisch Centrum  
Rotterdam, Nederland  
Tel: 010 703 38 54  
E-mail: c.vaneijck@erasmusmc.nl

### Onafhankelijke arts

Dr. M. C. Hulshof  
Radiotherapeut-oncoloog  
Amsterdam UMC  
Amsterdam, Nederland  
Tel: 020-44 42747  
Email: m.c.hulshof@amsterdamumc.nl

### Klachten:

Indien u niet tevreden bent over het onderzoek of de behandeling, kunt u terecht bij de onafhankelijke klachtenopvang/klachtenfunctionaris van het Erasmus MC. Op de website van het Erasmus MC is een Digitaal klachtenformulier beschikbaar via <https://www.erasmusmc.nl/nl-nl/patientenzorg/klachtenopvang-en-klachtenbemiddeling>.

Na het invullen wordt het formulier automatisch verzonden naar de klachtenfunctionaris.

Als het niet lukt om het digitale klachtenformulier in te vullen, dan kunt u uw klacht ook per post versturen: Erasmus MC, Secretariaat Klachtenopvang (GK-745), Antwoordnummer 55, 3000 WB Rotterdam.

Vermeld in de brief uw naam, patiëntnummer (indien van toepassing), naam van het onderzoek en contactgegevens. Na ontvangst van de brief zal de klachtenfunctionaris contact met u opnemen.

### Functionaris voor de Gegevensbescherming van de instelling:

De Functionaris voor de Gegevensbescherming van het Erasmus MC is bereikbaar via het secretariaat van de afdeling Juridische Zaken. E-mail: [functionaris.gegevensbescherming@erasmusmc.nl](mailto:functionaris.gegevensbescherming@erasmusmc.nl) Tel: 010-703 4986

Voor meer informatie over uw rechten:

Voor meer informatie of bij vragen over uw rechten kunt u contact opnemen met de functionaris voor de Gegevensbescherming of met de Autoriteit Persoonsgegevens.





## Bijlage B: Informatie over de verzekering

Voor iedereen die meedoet aan dit onderzoek, heeft Amsterdam UMC, locatie AMC een verzekering afgesloten. De verzekering dekt schade door deelname aan het onderzoek. Dit geldt voor schade tijdens het onderzoek of binnen vier jaar na het einde ervan. Schade moet u binnen die vier jaar aan de verzekeraar hebben gemeld.

De verzekering dekt niet alle schade. Onderaan deze tekst staat in het korte welke schade niet wordt gedekt. Deze bepalingen staan in het Besluit verplichte verzekering bij medisch-wetenschappelijk onderzoek met mensen. Dit besluit staat op [www.ccmo.nl](http://www.ccmo.nl), de website van de Centrale Commissie Mensgebonden Onderzoek (zie 'Bibliotheek' en dan 'Wet- en regelgeving').

Bij schade kunt u direct contact leggen met de verzekeraar [of schaderegelaar].

De verzekeraar van het onderzoek is:

Naam verzekeraar: Centramed B.A.  
Adres verzekeraar: Postbus 7374  
2701 AJ Zoetermeer  
Telefoon: 070 301 70 70  
E-mail: [info@centramed.nl](mailto:info@centramed.nl)  
Polisnummer: 624.528.303

De verzekering biedt een dekking van € 650.000 per proefpersoon met een maximum van € 5.000.000 voor het hele onderzoek en € 7.500.000 voor schade ten gevolge van medisch-wetenschappelijk onderzoek die per verzekeringsjaar wordt gemeld.

De verzekering dekt de volgende schade **niet**:

- schade door een risico waarover u in de schriftelijke informatie bent ingelicht. Dit geldt niet als het risico zich ernstiger voordoet dan was voorzien of als het risico heel onwaarschijnlijk was;
- schade aan uw gezondheid die ook zou zijn ontstaan als u niet aan het onderzoek had meegedaan;
- schade door het niet (volledig) opvolgen van aanwijzingen of instructies;
- schade aan uw nakomelingen, als gevolg van een negatief effect van het onderzoek op u of uw nakomelingen;
- schade door een bestaande behandelmethode bij onderzoek naar bestaande behandelmethoden.

Voorts wordt de proefpersoon verzocht dienaangaande contact op te nemen met dr. M.G.H. Besselink, telefoonnummer: +31-20-566 9111. Zie de voorgaande pagina voor contactgegevens.

**Bijlage C: Overzicht bezoeken**

| Afspraak | Inhoud afspraak                            |
|----------|--------------------------------------------|
| 1        | Intake gesprek radiotherapeut              |
| 2        | CT-scan + matras op maat aanmaken          |
| 3        | CT-scan in bestralingspositie + bestraling |

## Bijlage D: TOESTEMMINGSFORMULIER PROEFPERSOON

### Preoperatieve lokale bestraling ter voorkoming van alvleesklierlekkage na pancreatoduodenectomie (Whipple) operatie

Ik ben naar tevredenheid geïnformeerd over de doelstellingen van de studie. Ik heb de informatiebrief ontvangen en gelezen en er is mij voldoende gelegenheid gegeven hierover vragen te stellen. Mijn vragen zijn voldoende beantwoord. Ik had genoeg bedenktijd om na te denken over mijn deelname.

Ik weet dat meedoen vrijwillig is. Ook weet ik dat ik op ieder moment kan beslissen om toch niet mee te doen of te stoppen met het onderzoek. Daarvoor hoef ik geen reden te geven en verandert niets aan de relatie met mijn behandelend arts.

Ik geef toestemming voor het informeren van mijn huisarts dat ik meedoe aan dit onderzoek.

Ik geef toestemming voor het verzamelen en gebruiken van mijn gegevens en lichaamsmateriaal voor de beantwoording van de onderzoeksvraag in dit onderzoek.

Ik weet dat sommige mensen mijn gegevens kunnen inzien. Die mensen staan vermeld in deze informatiebrief. Ik geeft toestemming om mijn gegevens op de onderzoek locatie nog 20 jaar na dit onderzoek te bewaren.

Ik weet dat ik niet zwanger mag worden/mijn partner niet zwanger mag maken tijdens het onderzoek.

- Ik geef
  - wel**
  - geen**toestemming om mijn persoonsgegevens langer te bewaren en te gebruiken voor toekomstig onderzoek op het gebied van de onderzochte behandelwijze.
- Ik geef
  - wel**
  - geen**toestemming om mijn lichaamsmateriaal na dit onderzoek te bewaren en om dit later nog voor ander onderzoek te gebruiken, zoals in de informatiebrief staat.
- Ik geef
  - wel**
  - geen**toestemming om mij na dit onderzoek opnieuw te benaderen voor een vervolgonderzoek.

Hierbij verklaar ik mee te willen doen aan deze studie.

Naam proefpersoon:

Handtekening:

Datum : \_\_/\_\_/\_\_

-----

Ik verklaar dat ik deze proefpersoon volledig heb geïnformeerd over het genoemde onderzoek. Dit patiënt informatie formulier is in duplo getekend met de onderzoeker.

Als er tijdens het onderzoek informatie bekend wordt die de toestemming van de proefpersoon zou kunnen beïnvloeden, dan breng ik hem/haar daarvan tijdig op de hoogte.

Naam onderzoeker (of diens vertegenwoordiger):

Handtekening:

Datum: \_\_/\_\_/\_\_

-----

Aanvullende informatie is gegeven door (indien van toepassing):

Naam:

Functie:

Handtekening:

Datum: \_\_/\_\_/\_\_

-----

\* Doorhalen wat niet van toepassing is.
